# Supplementary material for: Multifunctional sustainable materials: the role of carbon existing protein in the enhanced gas and UV sensing performances of ZnO-based biofilms
Source: Royal Society of Chemistry journal article supplement (doi:10.1039/c7tc01305a), 2017-01-01
Supplement: c7tc01305a1.pdf [file c7tc01305a1.pdf]

## Supporting Information

### **Multifunctional sustainable materials: The role of carbon existing protein in the enhanced gas and UV sensing performances of ZnO-based biofilms**

Deepa Kathiravan<sup>†</sup>, Bohr-Ran Huang<sup>†\*</sup> and Adhimoorthy Saravanan<sup>†</sup>

<sup>†</sup> Graduate Institute of Electro-Optical Engineering and Department of Electronic and computer Engineering, National Taiwan University of Science and Technology, Taipei 106, Taiwan, R.O.C.;

\*To whom correspondence should be addressed. Email: [huangbr@mail.ntust.edu.tw](mailto:huangbr@mail.ntust.edu.tw)

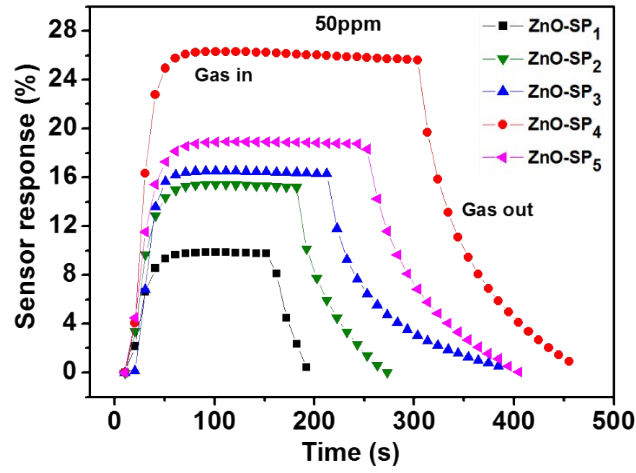

Figure S1: The  $H_2$  response and recovery curves of  $ZnO-SP_{1-5}$  measured at 50 ppm at room temperature.

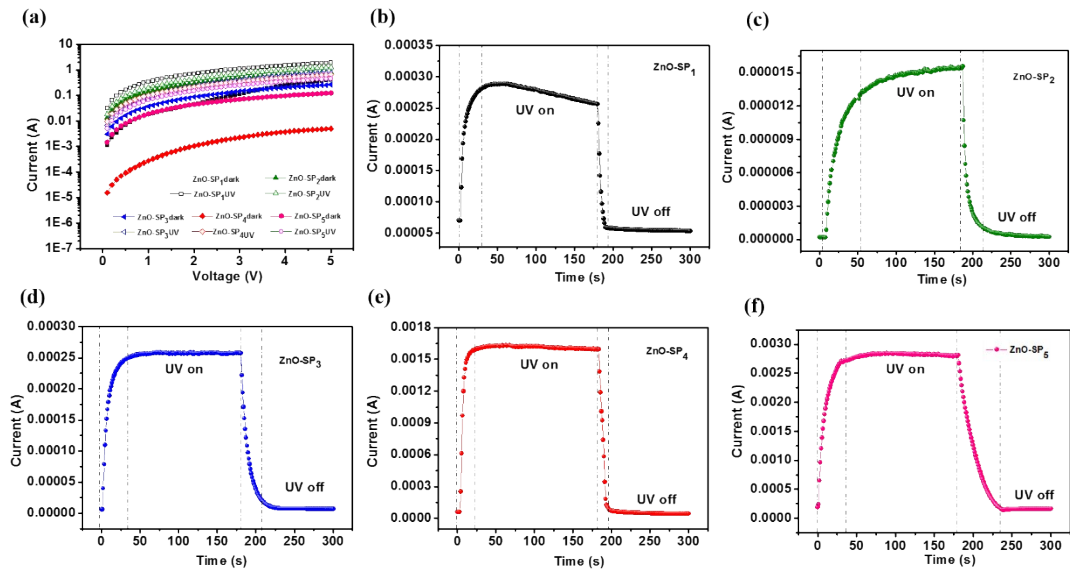

Figure S2: (a) The I-V characteristics of  $ZnO-SP_{1-5}$  measured under the applied bias of 5 V at room temperature and (b to f) I-t characteristics of  $ZnO-SP_{1-5}$  measured under the applied bias of 5 V at room temperature.

**Table S1 Comparison of sensor response of as-fabricated H<sub>2</sub> sensors in this study.**

| As-fabricated<br>H <sub>2</sub> sensors | Sensor response (%) |             |              |              |             |
|-----------------------------------------|---------------------|-------------|--------------|--------------|-------------|
|                                         | 10 ppm              | 30 ppm      | 50 ppm       | 100 ppm      | 200 ppm     |
| ZnO-SP <sub>1</sub>                     | 4.002               | 7.04        | 9.8          | 14.38        | 18.5        |
| ZnO-SP <sub>2</sub>                     | 7.98                | 10.5        | 15.4         | 20.69        | 27.9        |
| ZnO-SP <sub>3</sub>                     | 10.75               | 13.8        | 16.5         | 20.44        | 24.7        |
| ZnO-SP <sub>4</sub>                     | <b>16.37</b>        | <b>20.3</b> | <b>26.32</b> | <b>31.24</b> | <b>36.4</b> |
| ZnO-SP <sub>5</sub>                     | 8.33                | 11.76       | 18.92        | 21.9         | 24.9        |

**Table S2 Comparison of sensor response of as-fabricated UV sensors in this study.**

| As-fabricated UV<br>sensors | <i>Responsivity</i><br>( <i>AW<sup>-1</sup></i> ) |
|-----------------------------|---------------------------------------------------|
| ZnO-SP <sub>1</sub>         | 445                                               |
| ZnO-SP <sub>2</sub>         | 470                                               |
| ZnO-SP <sub>3</sub>         | 510                                               |
| <b>ZnO-SP<sub>4</sub></b>   | <b>650</b>                                        |
| ZnO-SP <sub>5</sub>         | 330                                               |
